# Supplementary material
Source: publisher figshare collection journal article supplement (https://gsajournals.figshare.com/ndownloader/files/15368189)
Supplement: Supplementary file 1 [file 15368189]

## Sheet: Sheet1
Table S2. Genotyping primers
Allele	Used for	Genotyping primer, Forward (5’ to 3’)	Genotyping primer, Reverse (5’ to 3’)
fgfr1auc61	sgRNA efficiency; Genotyping	ACCTGATAAGATGGAGAAGAAGC	TTTAAGCCACTTGAGCGTCG
fgfr1buc62	sgRNA efficiency; Genotyping	CCCACATCCAATGGCTCAAAC	TCTGACTGCATGTCAAGGTG
fgfr2uc64	sgRNA efficiency	TTTCCCTCTTCGCTCTGC	GGCACTTGAGCTTGAGCAG
fgfr2uc64	Genotyping	CACTCTTTCTCTCTCTTTCTTTCTGC	TGCAGCCAATCCCGAGTTACG
fgfr3uc51	sgRNA efficiency	TCTGTCTTGTCTCTGTTAGACTGGG	CGTGCAGGACAGAACTACTGTATCC
fgfr3uc51	Genotyping	ACTTCGATTGACTGCAGGTTGAA	ATGCTCTTGTGGGCATGTCTG
fgfr4uc42	sgRNA efficiency; Genotyping	TCCTGGATATCCTGAGAATGC	CCAGGCGATTACTGTCCTTC
